# Supplementary material for: A randomised comparison of Conventional versus Intentional straTegy in patients with high Risk prEdiction of Side branch OccLusion in coronary bifurcation interVEntion: rationale and design of the CIT-RESOLVE trial
Source: PubMed Central journal article supplement — BMJ Open. 2017 Jun 12;7(6):e016044. doi: 10.1136/bmjopen-2017-016044 (PMC5726078; doi:10.1136/bmjopen-2017-016044), 2017-06-12
Supplement: bmjopen-2017-016044supp001.pdf [file bmjopen-2017-016044supp001.pdf]

## Supplementary File

### List of Hospitals in the CIT-RESOLVE Trial

| Hospital                                                       | Province/Municipality | City      |
|----------------------------------------------------------------|-----------------------|-----------|
| Fuwai Hospital                                                 | Beijing               | Beijing   |
| Peking Union Medical College Hospital                          | Beijing               | Beijing   |
| Peking University Third Hospital                               | Beijing               | Beijing   |
| Beijing Xuanwu Hospital                                        | Beijing               | Beijing   |
| Chinese PLA General Hospital                                   | Beijing               | Beijing   |
| Beijing Anzhen Hospital                                        | Beijing               | Beijing   |
| Shanghai Tongji Hospital                                       | Shanghai              | Shanghai  |
| Shanghai Dongfang Hospital                                     | Shanghai              | Shanghai  |
| Renji Hospital, Shanghai Jiaotong<br>University of Medicine    | Shanghai              | Shanghai  |
| Shanghai Chest Hospital                                        | Shanghai              | Shanghai  |
| Guangdong General Hospital                                     | Guangdong             | Guangzhou |
| The First Affiliated Hospital of Xi'an<br>Jiaotong University  | Shanxi                | Xi'an     |
| Xijing Hospital                                                | Shanxi                | Xi'an     |
| Daqing Oilfield General Hospital                               | Heilongjiang          | Daqing    |
| The First Affiliated Hospital of Haerbin<br>Medical University | Heilongjiang          | Haerbin   |
| The Second Hospital of Jilin University                        | Jilin                 | Changchun |

|                                                                |          |          |
|----------------------------------------------------------------|----------|----------|
| The First Affiliated Hospital of Dalian<br>Medical University  | Liaoning | Dalian   |
| Shengjing Hospital of China Medical<br>University              | Liaoning | Shenyang |
| The First Affiliated Hospital of Guangxi<br>Medical University | Guangxi  | Nanning  |
| Hunan Provincial People's Hospital                             | Hunan    | Changsha |
| Cangzhou Central Hospital                                      | Hebei    | Cangzhou |

---
